# Supplementary material for: Silver Ion High-Performance Liquid Chromatography—Atmospheric Pressure Chemical Ionization Mass Spectrometry: A Tool for Analyzing Cuticular Hydrocarbons
Source: MDPI journal article supplement (doi:10.3390/molecules28093794), 2023-04-28
Supplement: s1 [file s1]

# Silver Ion High-Performance Liquid Chromatography — Atmospheric Pressure Chemical Ionization Mass Spectrometry: A Tool for Analyzing Cuticular Hydrocarbons

Vladimír Vrkoslav<sup>1</sup>, Petra Horká<sup>1,2</sup>, Jindřich Jindřich<sup>3</sup>, Miloš Buděšínský<sup>1</sup>, Josef Cvačka<sup>1,2\*</sup>

1. Institute of Organic Chemistry and Biochemistry of the Czech Academy of Sciences, Flemingovo  
Náměstí 542/2, 160 00 Prague, Czech Republic

2. Department of Analytical Chemistry, Faculty of Science, Charles University, Hlavova 2030/8,  
128 00 Prague, Czech Republic

3. Department of Organic Chemistry, Faculty of Science, Charles University, Hlavova 2030/8, 128 00  
Prague, Czech Republic

\* Correspondence: josef.cvacka@uochb.cas.cz

## List of content:

|                                                                                                 |   |
|-------------------------------------------------------------------------------------------------|---|
| Figure S1 - Chromatograms of <i>N. bullata</i> cuticular HCs . . . . .                          | 2 |
| Figure S2 - Chromatogram and mass spectra of diunsaturated HCs from <i>N. bullata</i> . . . . . | 3 |
| Figure S3 - Chromatogram of <i>P. americana</i> cuticular HCs . . . . .                         | 4 |
| Figure S4 - APCI spectra of <i>P. americana</i> cuticular HCs . . . . .                         | 5 |
| Figure S5 - Chromatogram and mass spectra of diunsaturated HCs from <i>P. americana</i> . . .   | 6 |

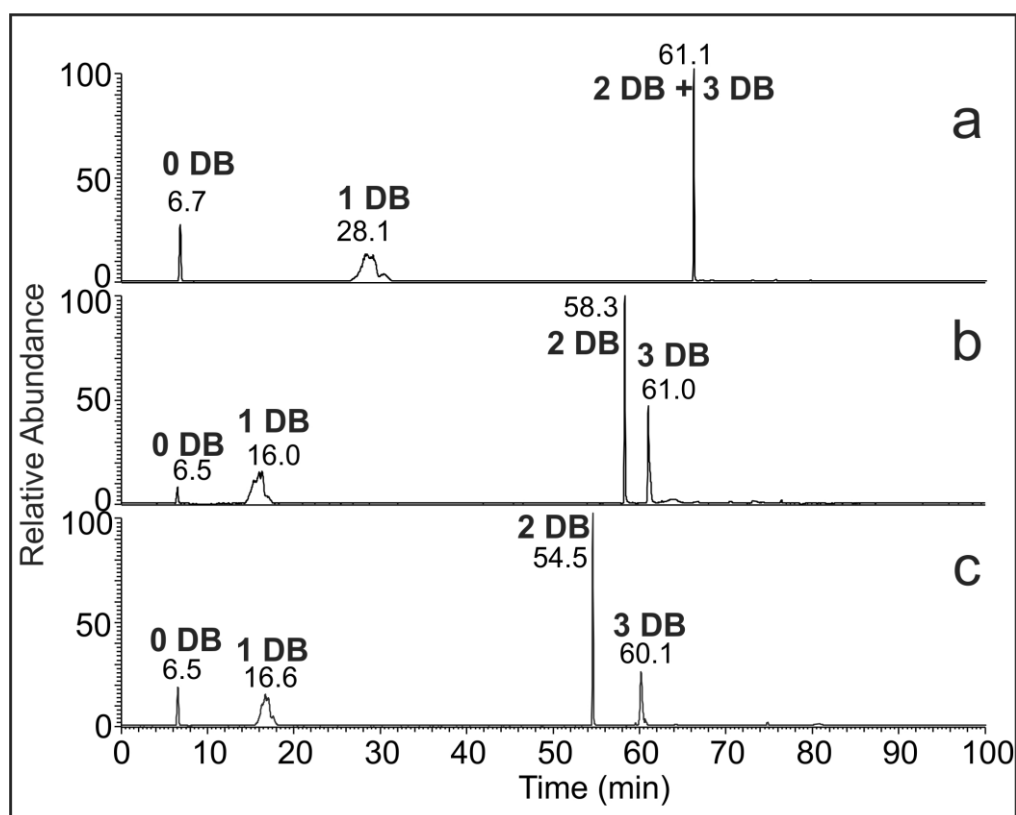

**Figure S1.** Chromatograms of *N. bullata* cuticular HCs at (a) 15°C, (b) 25°C, and (c) 35°C. The sample was separated in the solvent system I with a linear increase of toluene (B) in hexane (A) at 0.556 % B/min.

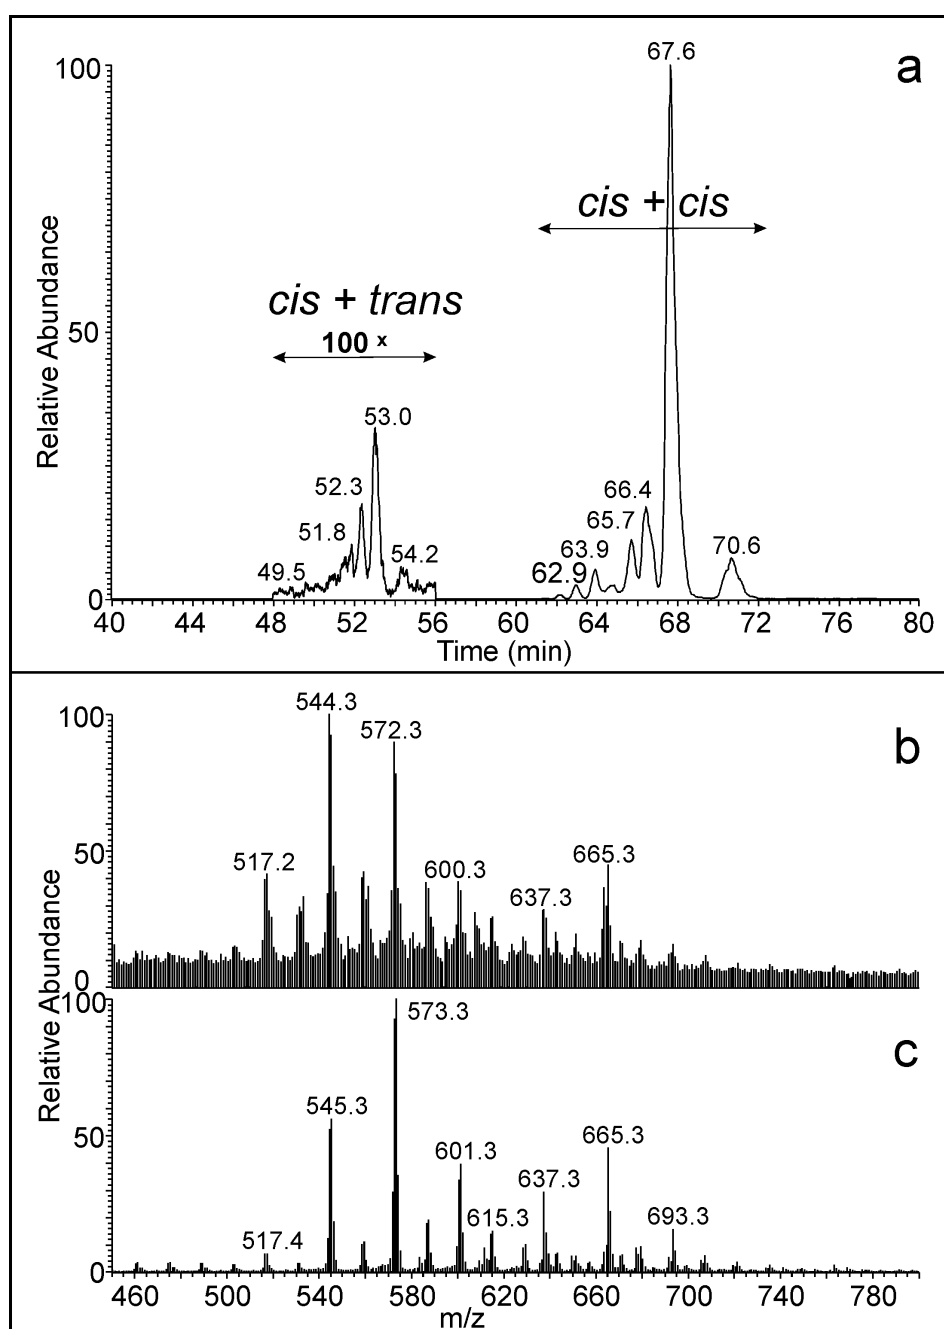

**Figure S2.** (a) Basepeak chromatogram of diunsaturated HCs from *N. bullata*, (b) APCI-MS spectrum averaged within  $R_t$  50.0-55.5 min (one trans double bond, one cis), and (c) APCI-MS spectrum averaged within  $R_t$  61.4-71.8 min (two cis double bonds). The sample was separated in the solvent system III with a linear increase of toluene (B) in hexane (A) at 0.50 % B/min. The column temperature was 15°C.

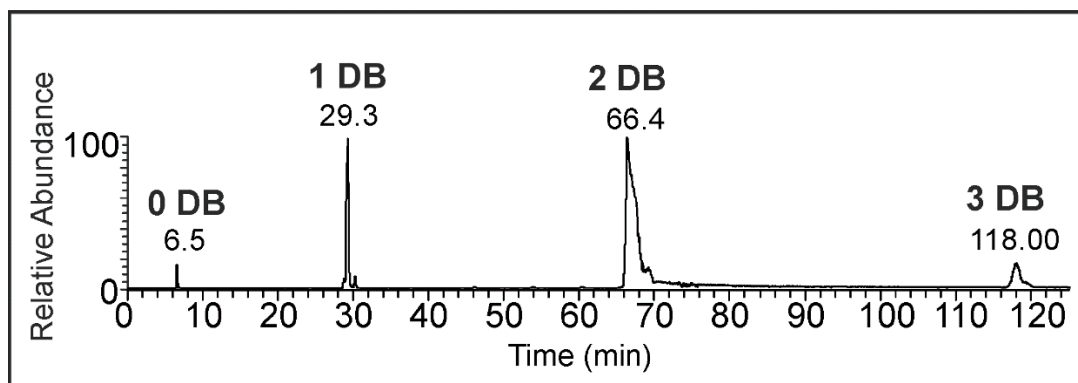

**Figure S3.** Ag-HPLC/APCI-MS chromatogram of *P. americana* cuticular HCs. The sample was separated in the solvent system III with a linear increase of toluene (B) in hexane (A) at 0.50 % B/min. The column temperature was 15°C.

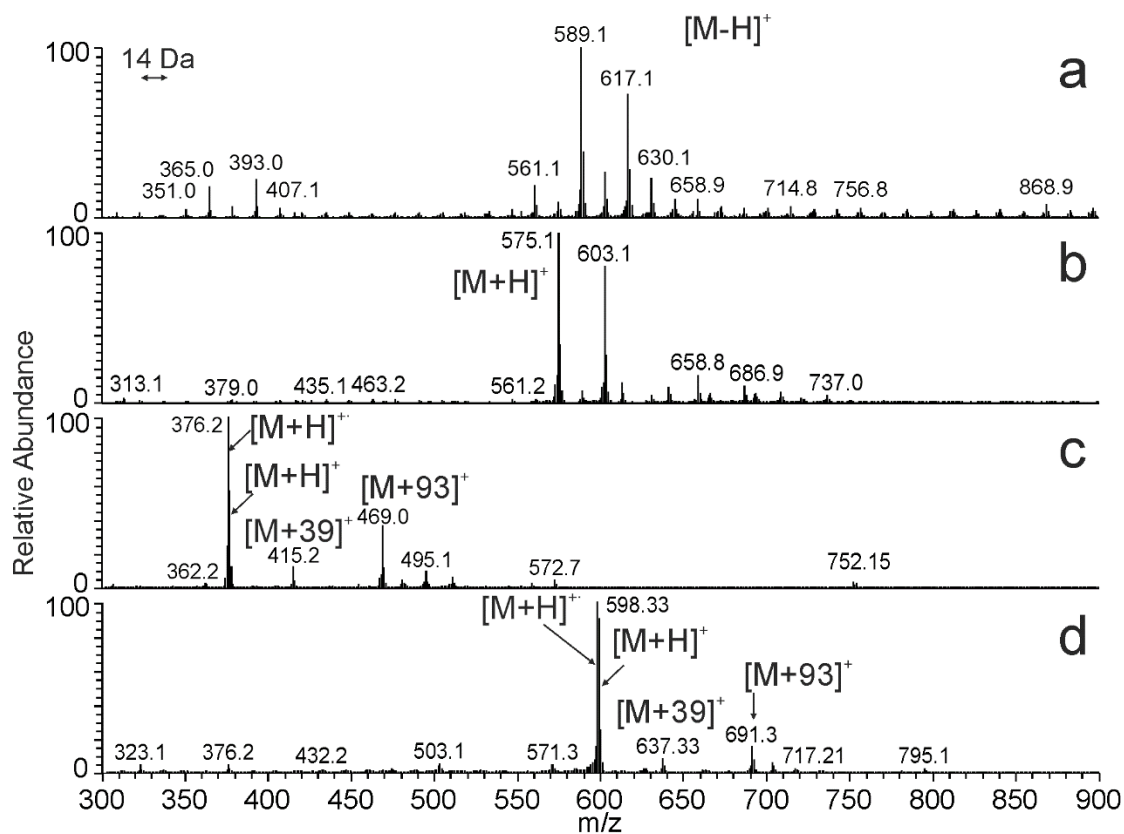

**Figure S4.** APCI spectra of *P. americana* cuticular HCs with a) 0, b) 1, c) 2, and d) 3 double bonds. The spectra were taken from the most abundant chromatographic peaks, a) 6.1-6.8 min, b) 29.0-29.4 min, c) 67.9-68.9 min, and d) 117.4-118.2 min. The sample was separated in the solvent system III with a linear increase of toluene (B) in hexane (A) at 0.50 % B/min. The column temperature was 15°C (Figure S3).

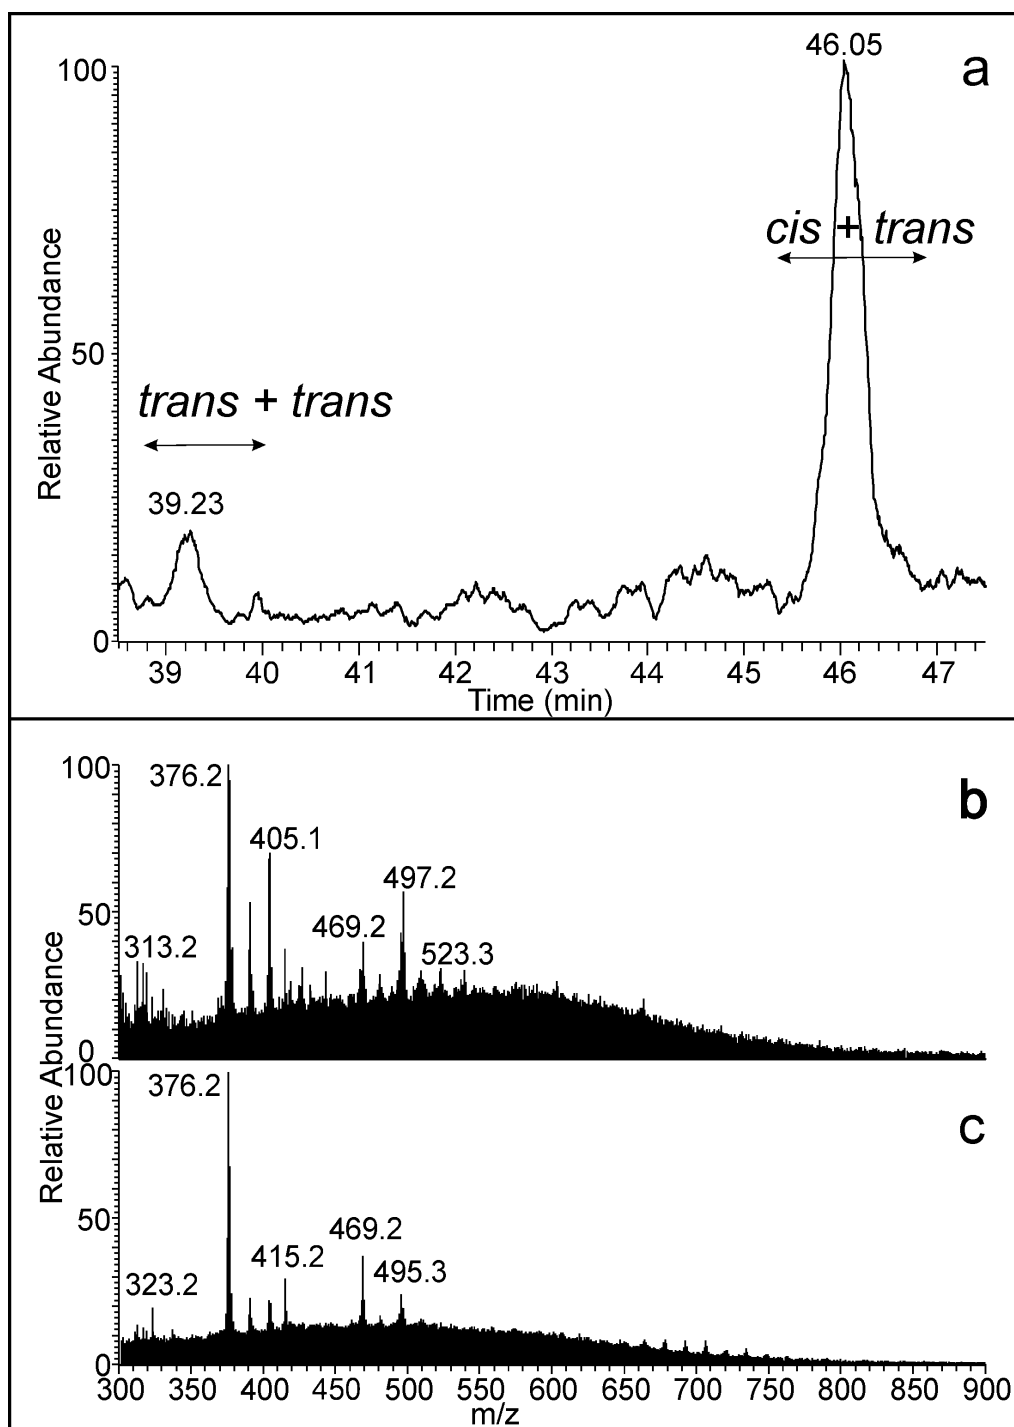

**Figure S5.** (a) Basepeak chromatogram of diunsaturated HCs from *P. americana*, (b) APCI-MS spectrum averaged within  $R_t$  39.0-39.5 min range (two trans double bonds), and (c) APCI-MS spectrum averaged within  $R_t$  45.8-46.4 min range (one cis double bond, one trans). The sample was separated in the solvent system III with a linear increase of toluene (B) in hexane (A) at 0.50 % B/min. The column temperature was 15°C.
